# Supplementary material for: Association of respiratory symptoms and asthma with occupational exposures: findings from a population-based cross-sectional survey in Telemark, Norway
Source: PubMed Central journal article supplement — BMJ Open. 2017 Mar 22;7(3):e014018. doi: 10.1136/bmjopen-2016-014018 (PMC5372104; doi:10.1136/bmjopen-2016-014018), 2017-03-22
Supplement: bmjopen-2016-014018supp.pdf [file bmjopen-2016-014018supp.pdf]

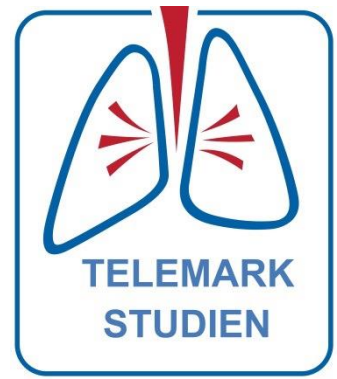

# THE TELEMAR STUDY

- A health research project

# Personal information

Today's date (ddmmyy):

|  |  |  |  |  |  |  |  |  |  |
|--|--|--|--|--|--|--|--|--|--|
|  |  |  |  |  |  |  |  |  |  |
|--|--|--|--|--|--|--|--|--|--|

Gender:

- Female  
 Male

Height: 

|  |  |  |
|--|--|--|
|  |  |  |
|--|--|--|

 cm

Weight: 

|  |  |  |
|--|--|--|
|  |  |  |
|--|--|--|

, 

|  |
|--|
|  |
|--|

 kg

What is your marital status?

- Single  
 Married  
 Partner  
 Divorced/separated  
 Widow

How many years of school do you have?

(Starting with the first class of primary school up to the last fully completed academic year).

|  |  |
|--|--|
|  |  |
|--|--|

 Years

What is your highest level education?

(Are you currently in secondary/vocational school/college/university? Please cross off your highest completed level of formal education).

- Elementary school/grade school  
 Basic courses/1-2 year(s) of education after elementary school  
 Secondary/high school/vocational school (3-years)  
 Certificate  
 University/College - 4 years or less  
 University/College - more than 4 years  
 Other: \_\_\_\_\_

We assume that your employability, when it was at its best would rate 10 points. How many points would you give to rate your employability?

(0 means that you cannot work and 10 that your employability is at its best right now).

|                          |                          |                          |                          |                          |                          |                          |                          |                          |                          |                          |
|--------------------------|--------------------------|--------------------------|--------------------------|--------------------------|--------------------------|--------------------------|--------------------------|--------------------------|--------------------------|--------------------------|
| 0                        | 1                        | 2                        | 3                        | 4                        | 5                        | 6                        | 7                        | 8                        | 9                        | 10                       |
| <input type="checkbox"/> |

# Working conditions

**1.** Have you ever been in work?

- No (go to question 10)  
 Yes (go to question 2)

**2.** Describe your employment and work tasks with their associated time frames. If you have worked less than three months you do not need to respond.

If you have had many employers with similar works tasks merge them into one and proceed through the questionnaire. (Example: Building and construction, excavator driver with Selmer/Pavement/Ripper-Smith, 1993-2009). If you have been self-employed consider this as employment and proceed through the questionnaire.

**Examples:**

|                               |                                  |      |             |
|-------------------------------|----------------------------------|------|-------------|
| Yara/ Fertilizer Manufacturer | Process operator                 | 2008 | 2010        |
| Teaching                      | Teacher at the vocational school | 2010 | 2011        |
| Consulting                    | Consultant company               | 2011 | present day |

| Sector/industry | Profession (title)/work tasks | Year started | Year ended |
|-----------------|-------------------------------|--------------|------------|
|                 |                               |              |            |
|                 |                               |              |            |
|                 |                               |              |            |
|                 |                               |              |            |
|                 |                               |              |            |
|                 |                               |              |            |
|                 |                               |              |            |
|                 |                               |              |            |
|                 |                               |              |            |

**3.** Have you been in work for **the past 12 months**?

- No  
 Yes

**Supplementary questions about your work tasks in various employment situations: Many of these questions are specific to certain professions. If the question does not apply to you; answer no and move on to the next question.**

**4.** Have you in your work been subjected to: Gas, smoke or dust?

- No  
 Yes

**5.**

If you have been exposed to the gas, smoke or dust over the course of **the last five years** - how often? (Cross off an average)

- Daily, for large parts of the working day
- Daily, but for short periods
- Weekly
- Less often

**6.**

Have you **ever**, in your **work**, been exposed to:

|                                   | No                       | Yes                      | Last year of exposure |
|-----------------------------------|--------------------------|--------------------------|-----------------------|
| Smoke from frying                 | <input type="checkbox"/> | <input type="checkbox"/> | <input type="text"/>  |
| Car/engine exhaust                | <input type="checkbox"/> | <input type="checkbox"/> | <input type="text"/>  |
| Strong acids, ammonia or formalin | <input type="checkbox"/> | <input type="checkbox"/> | <input type="text"/>  |
| Stone dust                        | <input type="checkbox"/> | <input type="checkbox"/> | <input type="text"/>  |
| Flour dust                        | <input type="checkbox"/> | <input type="checkbox"/> | <input type="text"/>  |
| Wood dust                         | <input type="checkbox"/> | <input type="checkbox"/> | <input type="text"/>  |
| Paper dust                        | <input type="checkbox"/> | <input type="checkbox"/> | <input type="text"/>  |
| Textile dust                      | <input type="checkbox"/> | <input type="checkbox"/> | <input type="text"/>  |
| Metal dust                        | <input type="checkbox"/> | <input type="checkbox"/> | <input type="text"/>  |

**7.**

At work have you worked with:

|                               | No                       | Yes                      | Last year of exposure |
|-------------------------------|--------------------------|--------------------------|-----------------------|
| Cleaning/disinfection agents  | <input type="checkbox"/> | <input type="checkbox"/> | <input type="text"/>  |
| If YES, do/did you use spray? | <input type="checkbox"/> | <input type="checkbox"/> | <input type="text"/>  |
| Superglue or similar          | <input type="checkbox"/> | <input type="checkbox"/> | <input type="text"/>  |
| Painting or varnishing work   | <input type="checkbox"/> | <input type="checkbox"/> | <input type="text"/>  |
| Welding or other metal smoke  | <input type="checkbox"/> | <input type="checkbox"/> | <input type="text"/>  |
| Sewage or treatment plants    | <input type="checkbox"/> | <input type="checkbox"/> | <input type="text"/>  |
| Hair care products            | <input type="checkbox"/> | <input type="checkbox"/> | <input type="text"/>  |
| Animals                       | <input type="checkbox"/> | <input type="checkbox"/> | <input type="text"/>  |

If YES, which animals? \_\_\_\_\_

Gas, dust or damp not mentioned above

\_\_\_\_\_

8.

| <i>Have you worked in offices with:</i>                                                 | No                       | Yes                      | Last year of exposure |
|-----------------------------------------------------------------------------------------|--------------------------|--------------------------|-----------------------|
| Visible moisture damage                                                                 | <input type="checkbox"/> | <input type="checkbox"/> | <input type="text"/>  |
| Visible mold                                                                            | <input type="checkbox"/> | <input type="checkbox"/> | <input type="text"/>  |
| Smell of mildew (basement smell)                                                        | <input type="checkbox"/> | <input type="checkbox"/> | <input type="text"/>  |
| Cold (in the cold room or outdoors in winter)                                           | <input type="checkbox"/> | <input type="checkbox"/> | <input type="text"/>  |
| Have you had physically strenuous work (so that you have been out of breath and sweaty) | <input type="checkbox"/> | <input type="checkbox"/> | <input type="text"/>  |
| Have you had work with repetitive heavy lifting?                                        | <input type="checkbox"/> | <input type="checkbox"/> | <input type="text"/>  |

9.

*Have you used respiratory protection (safety/dust mask) at work during **the last 12 months?***

- Always/almost always
- From time to time
- Never/almost never

*Have you only used respiratory protection in cases of high exposure?*

- No
- Yes

10.

*Have you had an accident at work or in your leisure time where you have been exposed to high levels of gas, smoke or dust?*

- No
- Yes

*If YES, did you experience respiratory problems (coughing, shortness of breath, wheezing/rasping) when the accident happened or immediately afterwards?*

- No
- Yes

**11.**

# Respiratory symptoms

|      |                                                                                                                                                                | No                       | Yes                      |
|------|----------------------------------------------------------------------------------------------------------------------------------------------------------------|--------------------------|--------------------------|
| 11.1 | Have you had wheezing or whistling in the chest at some point over the course <b>of the last 12 months?</b>                                                    | <input type="checkbox"/> | <input type="checkbox"/> |
|      | If NO, go to question 11.2, if YES:                                                                                                                            |                          |                          |
| a    | Have you ever felt out of breath due to wheezing or whistling in your chest?                                                                                   | <input type="checkbox"/> | <input type="checkbox"/> |
| b    | Have you had whistling or wheezing in your chest without having a cold?                                                                                        | <input type="checkbox"/> | <input type="checkbox"/> |
| 11.2 | Have you woken up with a feeling of tightness in your chest at any time in <b>the last 12 months?</b>                                                          | <input type="checkbox"/> | <input type="checkbox"/> |
| 11.3 | Have you woken up with breathing difficulties over the course of <b>the last 12 months?</b>                                                                    | <input type="checkbox"/> | <input type="checkbox"/> |
| 11.4 | Have you woken up due to coughing attacks during <b>the last 12 months?</b>                                                                                    | <input type="checkbox"/> | <input type="checkbox"/> |
| 11.5 | Have you experienced an asthma attack in <b>the last 12 months?</b>                                                                                            | <input type="checkbox"/> | <input type="checkbox"/> |
|      | Do you currently use any medication (spray, inhalation powder or tablets) for asthma?                                                                          |                          |                          |
| 11.6 | Do you have allergies that cause nasal symptoms, including hay fever?                                                                                          | <input type="checkbox"/> | <input type="checkbox"/> |
| 11.7 | Have you during the last years had a prolonged cough?                                                                                                          | <input type="checkbox"/> | <input type="checkbox"/> |
| 11.8 | Do you usually cough up phlegm or have mucus in the lungs that is hard to get up?                                                                              | <input type="checkbox"/> | <input type="checkbox"/> |
|      | If NO go to question 11.9, if YES:                                                                                                                             |                          |                          |
| a    | Do you cough up or bring up phlegm in this way nearly every day for at least three months each year?                                                           | <input type="checkbox"/> | <input type="checkbox"/> |
| b    | Have you had periods with similar symptoms for at least two consecutive years?                                                                                 | <input type="checkbox"/> | <input type="checkbox"/> |
| c    | How old were you when these problems started? <input style="width: 50px; height: 20px;" type="text"/> Years                                                    |                          |                          |
| 11.9 | Have you ever had whistling or wheezing in the chest?                                                                                                          | <input type="checkbox"/> | <input type="checkbox"/> |
|      | If Yes, how old were you when you experienced whistling or wheezing in the chest the first time? <input style="width: 50px; height: 20px;" type="text"/> Years |                          |                          |

|                                                                                                  |                                                                                                                                                                                                     | No                       | Yes                      |
|--------------------------------------------------------------------------------------------------|-----------------------------------------------------------------------------------------------------------------------------------------------------------------------------------------------------|--------------------------|--------------------------|
| 11.10                                                                                            | Do you have, or have you ever had asthma?                                                                                                                                                           | <input type="checkbox"/> | <input type="checkbox"/> |
| If NO go to question, 11.11, if YES:                                                             |                                                                                                                                                                                                     |                          |                          |
| a                                                                                                | Has a doctor ever diagnosed you with asthma?                                                                                                                                                        | <input type="checkbox"/> | <input type="checkbox"/> |
| b                                                                                                | How old were you when you first experienced asthma symptoms? <input type="text"/> years                                                                                                             |                          |                          |
| d                                                                                                | What year did you last experience asthma symptoms? <input type="text"/> (yyyy)                                                                                                                      |                          |                          |
| 11.11                                                                                            | Has a doctor ever told you that you have chronic obstructive pulmonary disease (COPD)?                                                                                                              | <input type="checkbox"/> | <input type="checkbox"/> |
| If Yes, how old were you when you first experienced symptoms of COPD? <input type="text"/> years |                                                                                                                                                                                                     |                          |                          |
| 11.12                                                                                            | Have you ever experienced nasal symptoms such as stuffy nose, runny nose or sneeze attacks without having a cold?                                                                                   | <input type="checkbox"/> | <input type="checkbox"/> |
| If NO go to question 11.13, if YES:                                                              |                                                                                                                                                                                                     |                          |                          |
| a                                                                                                | How old were you when you first experienced these nasal symptoms? <input type="text"/> years                                                                                                        |                          |                          |
| b                                                                                                | Have you had nasal symptoms over <b>the course of the last 12 months?</b>                                                                                                                           | <input type="checkbox"/> | <input type="checkbox"/> |
| During which season are your symptoms worse? (select only one option)                            |                                                                                                                                                                                                     |                          |                          |
| c                                                                                                | <input type="checkbox"/> Spring <input type="checkbox"/> Summer <input type="checkbox"/> Autumn <input type="checkbox"/> Winter <input type="checkbox"/> Always <input type="checkbox"/> Don't know |                          |                          |
| 11.13                                                                                            | Have you ever had a blocked nose <b>for more than 12 weeks over the course of the last 12 months?</b>                                                                                               | <input type="checkbox"/> | <input type="checkbox"/> |
| 11.14                                                                                            | Have you had pain or pressure around the forehead, nose, or eyes <b>for more than 12 weeks over the course of the last 12 months?</b>                                                               | <input type="checkbox"/> | <input type="checkbox"/> |
| 11.15                                                                                            | Have you had discolored nose secretions (snot) or discolored mucus in the throat for <b>more than 12 weeks over the course of the last 12 months?</b>                                               | <input type="checkbox"/> | <input type="checkbox"/> |
| 11.16                                                                                            | Has your sense of smell been impaired or lost for <b>more than 12 weeks over the course of the last 12 months?</b>                                                                                  | <input type="checkbox"/> | <input type="checkbox"/> |

## Respiratory ailments and work

**12.** Have you ever had recurring respiratory symptoms (cough, heavy breathing, wheezing, whistling) while on the job?

- No (go to question 15)  
 Yes  
 Yes, in the last 12 months

*How serious were the respiratory symptoms?*

*(0 means that you did not have ailments and 10 that you had very serious ailments.)*

- |                          |                          |                          |                          |                          |                          |                          |                          |                          |                          |                          |
|--------------------------|--------------------------|--------------------------|--------------------------|--------------------------|--------------------------|--------------------------|--------------------------|--------------------------|--------------------------|--------------------------|
| 0                        | 1                        | 2                        | 3                        | 4                        | 5                        | 6                        | 7                        | 8                        | 9                        | 10                       |
| <input type="checkbox"/> |

**13.** Were your complaints better:

|                                     | No                       | Yes                      |
|-------------------------------------|--------------------------|--------------------------|
| - on weekends?                      | <input type="checkbox"/> | <input type="checkbox"/> |
| - during the holidays?              | <input type="checkbox"/> | <input type="checkbox"/> |
| - during other absence from work?   | <input type="checkbox"/> | <input type="checkbox"/> |
| - when changing your job/workplace? | <input type="checkbox"/> | <input type="checkbox"/> |

**14.** If you use/have used medicine to treat respiratory symptoms; can/could you reduce its use/dosage?

|                                     | No                       | Yes                      |
|-------------------------------------|--------------------------|--------------------------|
| - on weekends?                      | <input type="checkbox"/> | <input type="checkbox"/> |
| - during the holidays?              | <input type="checkbox"/> | <input type="checkbox"/> |
| - during other absence from work?   | <input type="checkbox"/> | <input type="checkbox"/> |
| - when changing your job/workplace? | <input type="checkbox"/> | <input type="checkbox"/> |



15. Have you ever changed your job because the job has affected your breathing?

- No  
 Yes

If Yes, when was it (in which year)?

Year  Year

If YES, which place of work (work tasks) did you have at that time?

---

16. Have you ever changed your job because of: Hay fever, or other nasal problems?

- No  
 Yes

If Yes, when was it (what or which year)?

Year  Year

If YES, which place of work (work tasks) did you have at that time?

---

17. Have you ever changed job due to other health problems/illnesses?

- No  
 Yes

18. Have you been on sick leave over **the course of the last 12 months?**

- No  
 Yes

If YES, for how many days? Choose only one option

1-7 days  8 -14 days  15 days - 12 weeks  More than 12 weeks

Have you been off work due to breathing problems in **the last 12 months?**

- No  
 Yes

## Smoking and snuff

19.

|                                                                                       | No                       | Yes                      |
|---------------------------------------------------------------------------------------|--------------------------|--------------------------|
| Do you smoke daily (even if you only smoke a few cigarettes, cigars or a pipe daily)? | <input type="checkbox"/> | <input type="checkbox"/> |
| Do you smoke only occasionally (not daily, but weekends, party smoking or the like)?  | <input type="checkbox"/> | <input type="checkbox"/> |
| Did you use to smoke?                                                                 | <input type="checkbox"/> | <input type="checkbox"/> |

If the answer is NO to question 19, go to question 25.

20. How much did you smoke? (Give an average)  
 Cigarettes per day or  cigarettes per week  
 Cigars per week  
 Packs of rolling tobacco-/pipe tobacco per week

21. How old were you when you started smoking?  
 Years

22. How long have you been smoking (this applies to both current and former smoking)?  
 Years

23. If you smoked in the past, when did you quit?  
 Year

24. Do you use, or have you used snuff?  
 No, never                       Yes from time to time  
 Yes, but I stopped             Yes, daily

If you have **never** taken snuff, go to question 26.

If YES:

How old were you when started to take snuff?  years

How many tins of snuff do/did you use per month?  tins

If you have stopped taking snuff, how old were you stopped?  years

## Living conditions

26. What type of residence do you live in? (Choose two options)  
 Detached house                       Apartment/lodgings  
 Row house/Semi-detached             Other

27. When did you move into your current residence?  
 year

How many hours per day do you normally spend in your home?  
Weekdays  hours            Weekends  hours

28. Is tobacco smoked inside your current residence? Choose only one option.  
 Almost daily    1-4 times/week    1-4 times/week    Never

**29.** Have you had any of the following in your residence?

|                                                                                                                                | No                       | Yes                      | The number of years  | The last year you were exposed. |
|--------------------------------------------------------------------------------------------------------------------------------|--------------------------|--------------------------|----------------------|---------------------------------|
| Water damage/damage from damp inside the dwelling on walls, floors or ceilings?                                                | <input type="checkbox"/> | <input type="checkbox"/> | <input type="text"/> | <input type="text"/>            |
| "Warped" plastic mats, yellowed plastic coating or wood flooring that has become dark due to moisture?                         | <input type="checkbox"/> | <input type="checkbox"/> | <input type="text"/> | <input type="text"/>            |
| Visible mold on walls, floors or ceilings?                                                                                     | <input type="checkbox"/> | <input type="checkbox"/> | <input type="text"/> | <input type="text"/>            |
| Have you at any time over the course of the last 10 years seen signs of moisture damage, water leakage or mildew in your home? | <input type="checkbox"/> | <input type="checkbox"/> | <input type="text"/> | <input type="text"/>            |

**30.** *Is your bedroom window near a street (less than 20 m)? Choose only one option*

- No
  Yes, with moderate traffic  
 Yes, with light traffic
  Yes, with a lot of traffic

**31.** *How much time do you usually spend travelling along a moderate-to very busy road in the course of a normal day?*

About  minutes/day

*Which of following heating methods were used in your home when you were five years old? Select more than one option if applicable.*

- Wood  
 Coal  
 Paraffin  
 Electricity  
 Gas  
 Oil  
 Water-borne/district heating

**32.** *What word best describes the place you lived most of the time when you were under five years old? Choose only one option*

- Farm with animals  
 Farm without animals  
 Hamlet/village  
 Small town/close to a town  
 Large city

**33.** *Have you over the past 12 months used spray products regularly for cleaning at home?*

- No  
 Yes

## Childhood and family

34.

|                                                                              | No                       | Yes                      | Do not know              |
|------------------------------------------------------------------------------|--------------------------|--------------------------|--------------------------|
| Did you as a child, have a severe respiratory infection before the age of 5? | <input type="checkbox"/> | <input type="checkbox"/> | <input type="checkbox"/> |
| Did your mother smoke regularly when you were a child?                       | <input type="checkbox"/> | <input type="checkbox"/> | <input type="checkbox"/> |
| Did your father smoke regularly when you were a child?                       | <input type="checkbox"/> | <input type="checkbox"/> | <input type="checkbox"/> |
| Did anyone else in your home smoke on a regular basis when you were a child? | <input type="checkbox"/> | <input type="checkbox"/> | <input type="checkbox"/> |

35.

*Do you have parents who have, or have had, the following diseases (provide a response for deceased parents)? Use a cross mark if the answer is YES*

|                                       | Mother                   | Father                   |
|---------------------------------------|--------------------------|--------------------------|
| Asthma                                | <input type="checkbox"/> | <input type="checkbox"/> |
| Chronic bronchitis, emphysema or COPD | <input type="checkbox"/> | <input type="checkbox"/> |
| Heart disease                         | <input type="checkbox"/> | <input type="checkbox"/> |
| High blood pressure                   | <input type="checkbox"/> | <input type="checkbox"/> |
| Brain hemorrhage/stroke               | <input type="checkbox"/> | <input type="checkbox"/> |
| Diabetes (diabetic)                   | <input type="checkbox"/> | <input type="checkbox"/> |
| Cancer                                | <input type="checkbox"/> | <input type="checkbox"/> |

## Physical activity and diet

36.

*–How often do you train? (Give an average)*

- Never
  2-3 times per week  
 Less than 1 time per week
  About daily (4-7) times per week  
 1 time per week

37.

*If you train once per week or more:*

*How hard do you exercise?*

- Take it easy without getting out of breath or sweaty  
 Take it so hard that I get out of breath and/or sweaty  
 I am almost exhausted

**38.** How long do you usually work out? (Give an average)

- Less than 15 minutes       30 minutes to 1 hour  
 15-29 minutes               More than 1 hour

**39.** Do you usually have at least 30 minutes of physical activity daily?

- No     Yes

**40.** How often do you usually eat these foods? Make a cross in the box

|                                                                                   | 0-3 times<br>per month   | 1-3 times<br>per week    | 4-6 times<br>per week    | 1 time<br>per day        | 2 times or<br>more<br>per day |
|-----------------------------------------------------------------------------------|--------------------------|--------------------------|--------------------------|--------------------------|-------------------------------|
| Fruit/berries                                                                     | <input type="checkbox"/>      |
| Vegetables                                                                        | <input type="checkbox"/>      |
| Chocolate/candy                                                                   | <input type="checkbox"/>      |
| Boiled potatoes                                                                   | <input type="checkbox"/>      |
| Pasta/rice                                                                        | <input type="checkbox"/>      |
| Sausages/hamburgers                                                               | <input type="checkbox"/>      |
| Oily fish<br>(salmon, trout, herring, mackerel,<br>redfish as toppings at dinner) | <input type="checkbox"/>      |

**41.** Do you use the following supplements? Make a cross in the box

|                                    | Yes, daily               | Occasionally             | No                       |
|------------------------------------|--------------------------|--------------------------|--------------------------|
| Cod liver oil                      | <input type="checkbox"/> | <input type="checkbox"/> | <input type="checkbox"/> |
| Omega-3 capsules                   | <input type="checkbox"/> | <input type="checkbox"/> | <input type="checkbox"/> |
| Vitamin-and/or mineral supplements | <input type="checkbox"/> | <input type="checkbox"/> | <input type="checkbox"/> |

## Other diseases and symptoms

**42.** If you answer YES to the questions below, fill in your age on the far right.

(Cross either no or yes to all questions)

|                                                                                                 | No                       | Yes                      | If Yes, how old were you the <b>first</b> time? |
|-------------------------------------------------------------------------------------------------|--------------------------|--------------------------|-------------------------------------------------|
| Have you been told by a doctor that you have high blood pressure?                               | <input type="checkbox"/> | <input type="checkbox"/> | <input style="width: 50px;" type="text"/> year  |
| Has a doctor said that you have diabetes?                                                       | <input type="checkbox"/> | <input type="checkbox"/> | <input style="width: 50px;" type="text"/> year  |
| Have you been hospitalized with a heart attack or heart cramp (angina)?                         | <input type="checkbox"/> | <input type="checkbox"/> | <input style="width: 50px;" type="text"/> year  |
| Has a doctor ever told you have heart failure (weak heart, water on the lungs or swollen legs)? | <input type="checkbox"/> | <input type="checkbox"/> | <input style="width: 50px;" type="text"/> year  |

**43.** Do you have, or have you ever had any of these diseases/complaints?

Make a cross to indicate either no or yes to all the questions)

|                                                                  | No                       | Yes                      | If Yes, how old were you on the <b>first</b> occurrence? |
|------------------------------------------------------------------|--------------------------|--------------------------|----------------------------------------------------------|
| Stroke/aneurism                                                  | <input type="checkbox"/> | <input type="checkbox"/> | <input style="width: 50px;" type="text"/> year           |
| Atrial fibrillation?                                             | <input type="checkbox"/> | <input type="checkbox"/> | <input style="width: 50px;" type="text"/> year           |
| Eczema on the hands (with the exception of psoriasis)?           | <input type="checkbox"/> | <input type="checkbox"/> | <input style="width: 50px;" type="text"/> year           |
| Chronic lung disease other than asthma or COPD?                  | <input type="checkbox"/> | <input type="checkbox"/> | <input style="width: 50px;" type="text"/> year           |
| Have you ever had mental problems that you have sought help for? | <input type="checkbox"/> | <input type="checkbox"/> | <input style="width: 50px;" type="text"/> year           |
